# Supplementary material for: Correlation between Mild Traumatic Brain Injury-Induced Inflammatory Cytokines and Emotional Symptom Traits: A Systematic Review
Source: MDPI journal article supplement (doi:10.3390/brainsci12010102), 2022-01-12
Supplement: s1 [file s1]

Table S1: Search Strategy for Depression

| EMBASE                                                                                                                                                                                                                                                                                                                                                                                                                                                                                                                    | MEDLINE                                                                                                                                                                                                                                                                                                                                                                                                                                                                                                                   | PUBMED                                                                                                                                                                            | COCHRANE                                                                                                                                                                          | PSYCHINFO                                                                                                                                                                                                                                                                                                                                                                                                                                                                                                                 |
|---------------------------------------------------------------------------------------------------------------------------------------------------------------------------------------------------------------------------------------------------------------------------------------------------------------------------------------------------------------------------------------------------------------------------------------------------------------------------------------------------------------------------|---------------------------------------------------------------------------------------------------------------------------------------------------------------------------------------------------------------------------------------------------------------------------------------------------------------------------------------------------------------------------------------------------------------------------------------------------------------------------------------------------------------------------|-----------------------------------------------------------------------------------------------------------------------------------------------------------------------------------|-----------------------------------------------------------------------------------------------------------------------------------------------------------------------------------|---------------------------------------------------------------------------------------------------------------------------------------------------------------------------------------------------------------------------------------------------------------------------------------------------------------------------------------------------------------------------------------------------------------------------------------------------------------------------------------------------------------------------|
| <b>Strategy:</b><br><br>1. exp inflammation/ or inflammat*.mp.<br>2. exp cytokine/ or cytokine*.mp.<br>3. exp neuroinflammation/ or neuroinflammat*.mp.<br>4. 1 or 2 or 3<br>5. mtbi.mp.<br>6. exp brain concussion/ or exp concussion/ or concussion.mp.<br>7. exp mild traumatic brain injury/ or mild traumatic brain injur*.mp.<br>8. 5 or 6 or 7<br>9. exp depression/ or depression.mp. or exp long term depression/ or exp major depression/<br>10. 4 and 8 and 9<br>11. limit 11 to (human and english language). | <b>Strategy:</b><br><br>1. exp inflammation/ or inflammat*.mp.<br>2. exp cytokine/ or cytokine*.mp.<br>3. exp neuroinflammation/ or neuroinflammat*.mp.<br>4. 1 or 2 or 3<br>5. mtbi.mp.<br>6. exp brain concussion/ or exp concussion/ or concussion.mp.<br>7. exp mild traumatic brain injury/ or mild traumatic brain injur*.mp.<br>8. 5 or 6 or 7<br>9. exp depression/ or depression.mp. or exp long term depression/ or exp major depression/<br>10. 4 and 8 and 9<br>11. limit 11 to (human and english language). | <b>Strategy:</b><br><br>((depression) AND ((mtbi) OR (concussion) OR (brain concussion) OR (mild traumatic brain injur*)) AND ((inflammat*) OR (cytokine*) OR (neuroinflammat*))) | <b>Strategy:</b><br><br>((depression) AND ((mtbi) OR (concussion) OR (brain concussion) OR (mild traumatic brain injur*)) AND ((inflammat*) OR (cytokine*) OR (neuroinflammat*))) | <b>Strategy:</b><br><br>1. exp inflammation/ or inflammat*.mp.<br>2. exp cytokine/ or cytokine*.mp.<br>3. exp neuroinflammation/ or neuroinflammat*.mp.<br>4. 1 or 2 or 3<br>5. mtbi.mp.<br>6. exp brain concussion/ or exp concussion/ or concussion.mp.<br>7. exp mild traumatic brain injury/ or mild traumatic brain injur*.mp.<br>8. 5 or 6 or 7<br>9. exp depression/ or depression.mp. or exp long term depression/ or exp major depression/<br>10. 4 and 8 and 9<br>11. limit 11 to (human and english language). |

Table S2: Search Strategy for PTSD

| EMBASE                                                                  | MEDLINE                                                                 | PUBMED                                                                                                                                | COCHRANE                                                                                                                              | PSYCHINFO                                                               |
|-------------------------------------------------------------------------|-------------------------------------------------------------------------|---------------------------------------------------------------------------------------------------------------------------------------|---------------------------------------------------------------------------------------------------------------------------------------|-------------------------------------------------------------------------|
| <b>Strategy:</b>                                                        | <b>Strategy:</b>                                                        | <b>Strategy:</b>                                                                                                                      | <b>Strategy:</b>                                                                                                                      | <b>Strategy:</b>                                                        |
| 12. exp inflammation/ or inflammat*.mp.                                 | 12. exp inflammation/ or inflammat*.mp.                                 | (((PTSD) OR (posttraumatic stress disorder)) AND ((mtbi) OR (concussion) OR (brain concussion) OR (mild traumatic brain injur*))) AND | (((PTSD) OR (posttraumatic stress disorder)) AND ((mtbi) OR (concussion) OR (brain concussion) OR (mild traumatic brain injur*))) AND | 12. exp inflammation/ or inflammat*.mp.                                 |
| 13. exp cytokine/ or cytokine*.mp.                                      | 13. exp cytokine/ or cytokine*.mp.                                      | ((inflamm*) OR (cytokine*) OR (neuroinflamm*))                                                                                        | ((inflamm*) OR (cytokine*) OR (neuroinflamm*))                                                                                        | 13. exp cytokine/ or cytokine*.mp.                                      |
| 14. exp neuroinflammation/ or neuroinflammat*.mp.                       | 14. exp neuroinflammation/ or neuroinflammat*.mp.                       |                                                                                                                                       |                                                                                                                                       | 14. exp neuroinflammation/ or neuroinflammat*.mp.                       |
| 15. 1 or 2 or 3                                                         | 15. 1 or 2 or 3                                                         |                                                                                                                                       |                                                                                                                                       | 15. 1 or 2 or 3                                                         |
| 16. mtbi.mp.                                                            | 16. mtbi.mp.                                                            |                                                                                                                                       |                                                                                                                                       | 16. mtbi.mp.                                                            |
| 17. exp brain concussion/ or exp concussion/ or concussion.mp.          | 17. exp brain concussion/ or exp concussion/ or concussion.mp.          |                                                                                                                                       |                                                                                                                                       | 17. exp brain concussion/ or exp concussion/ or concussion.mp.          |
| 18. exp mild traumatic brain injury/ or mild traumatic brain injur*.mp. | 18. exp mild traumatic brain injury/ or mild traumatic brain injur*.mp. |                                                                                                                                       |                                                                                                                                       | 18. exp mild traumatic brain injury/ or mild traumatic brain injur*.mp. |
| 19. 5 or 6 or 7                                                         | 19. 5 or 6 or 7                                                         |                                                                                                                                       |                                                                                                                                       | 19. 5 or 6 or 7                                                         |
| 20. ptsd.mp. or exp posttraumatic stress disorder                       | 20. ptsd.mp. or exp posttraumatic stress disorder                       |                                                                                                                                       |                                                                                                                                       | 20. ptsd.mp. or exp posttraumatic stress disorder                       |
| 21. 4 and 8 and 9                                                       | 21. 4 and 8 and 9                                                       |                                                                                                                                       |                                                                                                                                       | 21. 4 and 8 and 9                                                       |
| 22. limit 11 to (human and english language).                           | 22. limit 11 to (human and english language).                           |                                                                                                                                       |                                                                                                                                       | 22. limit 11 to (human and english language).                           |
|                                                                         | 23.                                                                     |                                                                                                                                       |                                                                                                                                       | <b>23.</b>                                                              |

Table S3: Search Strategy for Anxiety

| EMBASE                                                                                                                                                                                                                                                                                                                                                                                                                                                                                          | MEDLINE                                                                                                                                                                                                                                                                                                                                                                                                                                                                                         | PUBMED                                                                                                                                                                                                    | COCHRANE                                                                                                                                                                                                  | PSYCHINFO                                                                                                                                                                                                                                                                                                                                                                                                                                                                                       |
|-------------------------------------------------------------------------------------------------------------------------------------------------------------------------------------------------------------------------------------------------------------------------------------------------------------------------------------------------------------------------------------------------------------------------------------------------------------------------------------------------|-------------------------------------------------------------------------------------------------------------------------------------------------------------------------------------------------------------------------------------------------------------------------------------------------------------------------------------------------------------------------------------------------------------------------------------------------------------------------------------------------|-----------------------------------------------------------------------------------------------------------------------------------------------------------------------------------------------------------|-----------------------------------------------------------------------------------------------------------------------------------------------------------------------------------------------------------|-------------------------------------------------------------------------------------------------------------------------------------------------------------------------------------------------------------------------------------------------------------------------------------------------------------------------------------------------------------------------------------------------------------------------------------------------------------------------------------------------|
| <b>Strategy:</b><br><br>23. exp inflammation/ or inflammat*.mp.<br>24. exp cytokine/ or cytokine*.mp.<br>25. exp neuroinflammation/ or neuroinflammat*.mp.<br>26. 1 or 2 or 3<br>27. mtbi.mp.<br>28. exp brain concussion/ or exp concussion/ or concussion.mp.<br>29. exp mild traumatic brain injury/ or mild traumatic brain injur*.mp.<br>30. 5 or 6 or 7<br>31. anxiety.mp. or exp anxiety disorder/ or exp anxiety/<br>32. 4 and 8 and 9<br>33. limit 11 to (human and english language). | <b>Strategy:</b><br><br>24. exp inflammation/ or inflammat*.mp.<br>25. exp cytokine/ or cytokine*.mp.<br>26. exp neuroinflammation/ or neuroinflammat*.mp.<br>27. 1 or 2 or 3<br>28. mtbi.mp.<br>29. exp brain concussion/ or exp concussion/ or concussion.mp.<br>30. exp mild traumatic brain injury/ or mild traumatic brain injur*.mp.<br>31. 5 or 6 or 7<br>32. anxiety.mp. or exp anxiety disorder/ or exp anxiety/<br>33. 4 and 8 and 9<br>34. limit 11 to (human and english language). | <b>Strategy:</b><br><br>(((anxiety) OR (anxiety disorder)) AND ((mtbi) OR (concussion) OR (brain concussion) OR (mild traumatic brain injur*))) AND<br>((inflammat*) OR (cytokine*) OR (neuroinflammat*)) | <b>Strategy:</b><br><br>(((anxiety) OR (anxiety disorder)) AND ((mtbi) OR (concussion) OR (brain concussion) OR (mild traumatic brain injur*))) AND<br>((inflammat*) OR (cytokine*) OR (neuroinflammat*)) | <b>Strategy:</b><br><br>24. exp inflammation/ or inflammat*.mp.<br>25. exp cytokine/ or cytokine*.mp.<br>26. exp neuroinflammation/ or neuroinflammat*.mp.<br>27. 1 or 2 or 3<br>28. mtbi.mp.<br>29. exp brain concussion/ or exp concussion/ or concussion.mp.<br>30. exp mild traumatic brain injury/ or mild traumatic brain injur*.mp.<br>31. 5 or 6 or 7<br>32. anxiety.mp. or exp anxiety disorder/ or exp anxiety/<br>33. 4 and 8 and 9<br>34. limit 11 to (human and english language). |
